# Supplementary material for: First principles study of the adsorption and dissociation mechanisms of H2S on a TiO2anatase (001) surface
Source: Royal Society of Chemistry journal article supplement (doi:10.1039/c5ra20875k), 2015-12-28
Supplement: c5ra20875k1.pdf [file c5ra20875k1.pdf]

## Supporting Information

### First principles study of the adsorption and dissociation mechanisms of H<sub>2</sub>S on TiO<sub>2</sub> anatase (001) surfaces

Naeem Shahzad<sup>a,c</sup>, Akhtar Hussain<sup>b,c,d</sup>, Naeem Mustafa<sup>b</sup>, Nisar Ali<sup>e</sup>, Mohammed Benali Kanoun<sup>f</sup>, Souraya Goumri-Said<sup>f,\*</sup>

<sup>a</sup> National University of Sciences and Technology, Islamabad, Pakistan

<sup>b</sup> TPD, Pakistan Institute of Nuclear Science and Technology (PINSTECH), P. O. Nilore, Islamabad, Pakistan

<sup>c</sup> National Centre for Physics, Quaid-e-Azam University Campus, Islamabad, Pakistan

<sup>d</sup> NED, Pakistan Institute of Engineering and Applied Sciences (PIEAS), P. O. Nilore, Islamabad, Pakistan

<sup>e</sup> Department of Physics, GPG Jehanzeb College Swat, Pakistan

<sup>f</sup> College of Science, Physics department, Al Faisal University, Riyadh 11533, Saudi Arabia

\*Email of corresponding author: [souraya.goumri-said@chemistry.gatech.edu](mailto:souraya.goumri-said@chemistry.gatech.edu),  
[sosaid@alfaisal.edu](mailto:sosaid@alfaisal.edu)

#### Additional Data File

**Table 1S:** Adsorption energies and different geometric parameters of all the species computed

| Surface                    | Species | Site                      | E <sub>ads</sub> | Bond lengths (Å)                                    | Bond angles(degrees)        |
|----------------------------|---------|---------------------------|------------------|-----------------------------------------------------|-----------------------------|
| TiO <sub>2</sub><br>(p2x2) | H       | Ti <sub>5c</sub>          | 1.09             | H-Ti <sub>5c</sub> = 5.14                           |                             |
|                            |         | O <sub>3c</sub>           | 0.29             | H-O <sub>3c</sub> = 1.6                             |                             |
|                            |         | hollow                    | -2.29            | O <sub>2c</sub> -H-O <sub>2c</sub> = 1.99           |                             |
|                            |         | O <sub>2c</sub>           | -2.75            | H-O <sub>2c</sub> = 0.97                            |                             |
|                            | OH      | O <sub>3c</sub> (tilted)  | -1.01            | H-O <sub>2c</sub> = 0.99; O-Ti <sub>5c</sub> = 2.12 | Ti <sub>5c</sub> -O-H = 108 |
|                            |         | Ti <sub>5c</sub> (linear) | -1.47            | H-O <sub>2c</sub> = 0.97; O-Ti <sub>5c</sub> = 1.82 | Ti <sub>5c</sub> -O-H = 180 |
|                            |         | Ti <sub>5c</sub> (tilted) | -1.85            | H-O <sub>2c</sub> = 0.98; O-Ti <sub>5c</sub> = 1.85 | Ti <sub>5c</sub> -O-H = 108 |
|                            | S       | Ti <sub>5c</sub>          | -0.91            | S-Ti <sub>5c</sub> = 2.22                           |                             |
|                            |         | hollow                    | -1.04            | O <sub>2c</sub> -S-O <sub>2c</sub> = 1.78           |                             |
|                            |         | O <sub>3c</sub>           | -1.67            | S-O <sub>2c</sub> = 1.72                            |                             |
|                            |         | O <sub>2c</sub>           | -2.46            | S-O <sub>3c</sub> = 1.73                            |                             |
|                            | HS      | O <sub>2c</sub>           | 0.16             | S-O <sub>2c</sub> = 3.31; S-H = 1.36                | O <sub>2c</sub> -S-H = 180  |
|                            |         | Ti <sub>5c</sub>          | 0.15             | S-Ti <sub>5c</sub> = 3.01; S-H = 1.36               | Ti <sub>5c</sub> -S-H = 180 |

|                                               |                                |                                                                                                          |                        |                                                                                                                         |                                                                                                                                        |
|-----------------------------------------------|--------------------------------|----------------------------------------------------------------------------------------------------------|------------------------|-------------------------------------------------------------------------------------------------------------------------|----------------------------------------------------------------------------------------------------------------------------------------|
|                                               |                                | O <sub>3c</sub>                                                                                          | -0.29                  | S-O <sub>3c</sub> = 2.61; S-H = 1.36                                                                                    | Ti <sub>5c</sub> -S-H = 126.5                                                                                                          |
|                                               |                                | hollow                                                                                                   | -1.26                  | S-O <sub>2c</sub> = 1.67; S-H = 1.36                                                                                    | O <sub>2c</sub> -S-H = 98.3                                                                                                            |
|                                               |                                |                                                                                                          |                        |                                                                                                                         |                                                                                                                                        |
| H <sub>2</sub> S                              |                                | hollow                                                                                                   | 2.66                   | S-O <sub>2c</sub> = 1.6; H-S-H = 1.38                                                                                   | H-S-H = 87.2; O <sub>2c</sub> -S-H = 100.5                                                                                             |
|                                               |                                | O <sub>2c</sub>                                                                                          | 0.04                   | S-O <sub>2c</sub> = 3.33; H-S-H = 1.35                                                                                  | H-S-H = 91.6                                                                                                                           |
|                                               |                                | Ti <sub>5c</sub>                                                                                         | -0.13                  | S-Ti <sub>5c</sub> = 2.73; H-S-H = 1.35                                                                                 | H-S-H = 96.5                                                                                                                           |
|                                               |                                | O <sub>3c</sub>                                                                                          | -0.17                  | S-O <sub>3c</sub> = 3.27; H-S-H = 1.35                                                                                  | H-S-H = 93.6                                                                                                                           |
| H <sub>2</sub> S-H <sub>2</sub> S             |                                | Ti <sub>5c</sub> -Ti <sub>5c</sub>                                                                       | -0.25                  | S-Ti <sub>5c</sub> = 2.72; H-S-H = 1.35-- S-Ti <sub>5c</sub> = 2.72; H-S-H = 1.35                                       | H-S-H = 97-- H-S-H = 97                                                                                                                |
|                                               |                                | Ti <sub>5c</sub> -O <sub>2c</sub>                                                                        | -0.47                  | S-Ti <sub>5c</sub> = 2.72; H-S-H = 1.35-- S-O <sub>2c</sub> = 3.08; H-S-H = 1.35                                        | H-S-H = 97-- H-S-H = 92.9; O <sub>2c</sub> -S-H = 73.2                                                                                 |
|                                               |                                |                                                                                                          |                        |                                                                                                                         |                                                                                                                                        |
| S-H <sub>2</sub> S                            |                                | Ti <sub>5c</sub> -O <sub>2c</sub>                                                                        | -0.16                  | S-Ti <sub>5c</sub> = 2.23--S-O <sub>2c</sub> = 3.02; H-S-H = 1.35                                                       | H-S-H = 93; O <sub>2c</sub> -S-H = 75                                                                                                  |
|                                               |                                | Ti <sub>5c</sub> -Ti <sub>5c</sub>                                                                       | -0.18                  | S-Ti <sub>5c</sub> = 2.23--S-Ti <sub>5c</sub> = 2.71; H-S-H = 1.35                                                      | H-S-H = 97.3                                                                                                                           |
|                                               |                                | Ti <sub>5c</sub> -O <sub>2c</sub>                                                                        | -0.21                  | S-O <sub>2c</sub> = 1.72-- S-Ti <sub>5c</sub> = 2.65; H-S-H = 1.35                                                      | H-S-H = 98                                                                                                                             |
|                                               |                                | O <sub>2c</sub> -O <sub>3c</sub>                                                                         | -0.91                  | S-O <sub>2c</sub> = 1.62--S-O <sub>3c</sub> = 2.47; H-S-H = 1.41                                                        | H-S-H = 89.9                                                                                                                           |
|                                               |                                |                                                                                                          |                        |                                                                                                                         |                                                                                                                                        |
| S-HS                                          |                                | Ti <sub>5c</sub> -Ti <sub>5c</sub>                                                                       | 0.23                   | S-Ti <sub>5c</sub> = 2.22-- S-Ti <sub>5c</sub> = 2.76; S-H = 1.35                                                       |                                                                                                                                        |
|                                               |                                | Ti <sub>5c</sub> -O <sub>2c</sub>                                                                        | -0.04                  | S-Ti <sub>5c</sub> = 2.31-- S-O <sub>2c</sub> = 2.57; S-H = 1.36                                                        |                                                                                                                                        |
|                                               |                                | O <sub>2c</sub> -Ti <sub>5c</sub>                                                                        | -0.33                  | S-O <sub>2c</sub> = 1.66--S-Ti <sub>5c</sub> = 2.41--; S-H = 1.34                                                       | Ti <sub>5c</sub> -O <sub>2c</sub> -S = 138.6                                                                                           |
|                                               |                                | O <sub>2c</sub> -O <sub>3c</sub>                                                                         | -0.9                   | S-O <sub>2c</sub> = 1.66--S-O <sub>3c</sub> = 2.56; S-H = 1.36                                                          |                                                                                                                                        |
|                                               |                                |                                                                                                          |                        |                                                                                                                         |                                                                                                                                        |
| H <sub>2</sub> S+OH                           |                                | no S, H <sub>2</sub> S-O <sub>2c</sub> , OH-Ti <sub>5c</sub>                                             | -0.33                  | S-Ti <sub>5c</sub> = 3.03; H-S-H = 1.35; H-S-H = 1.42--O-Ti <sub>5c</sub> = 1.92; O-H = 0.97                            | O <sub>2c</sub> -Ti <sub>5c</sub> -S = 68.4; H-S-H = 92.9--Ti <sub>5c</sub> -O-H = 112.4                                               |
| H <sub>2</sub> S+OH-90                        |                                | no S, H <sub>2</sub> S-Ti <sub>5c</sub> , with H atoms 90° rotated, OH-O <sub>2c</sub>                   | -0.09                  | S-Ti <sub>5c</sub> = 2.92; H-S-H = 1.35--O-Ti <sub>5c</sub> = 1.87; O-H = 0.97                                          | Ti <sub>5c</sub> -S-H = 91.6; H-S-H = 91.1--Ti <sub>5c</sub> -O-H = 108.9                                                              |
| S+H <sub>2</sub> S+OH                         |                                | S-O <sub>2c</sub> , H <sub>2</sub> S-O <sub>2c</sub> , OH-Ti <sub>5c</sub>                               | -1.54                  | S-O <sub>2c</sub> = 1.6-- S-Ti <sub>5c</sub> = 2.78; H-S-H = 1.35; H-S-H = 1.42-- O-Ti <sub>5c</sub> = 1.92; O-H = 0.97 | O <sub>2c</sub> -S-Ti <sub>5c</sub> = 65.1; O <sub>2c</sub> -Ti <sub>5c</sub> -S = 79.1; H-S-H = 93.4°-- H-O-Ti <sub>5c</sub> = 113    |
| S+H <sub>2</sub> S+OH-90                      |                                | S-O <sub>2c</sub> , H <sub>2</sub> S-O <sub>2c</sub> , with H atoms 90° rotated, OH-O <sub>2c</sub>      | -1.07                  | S-O <sub>2c</sub> = 1.63-- S-Ti <sub>5c</sub> = 2.91; H-S-H = 1.36-- O-Ti <sub>5c</sub> = 1.87; O-H = 0.97              | H-S-Ti <sub>5c</sub> = 91.76; H-S-H = 91.4--H-O-Ti <sub>5c</sub> = 113.2°                                                              |
| <b>Surface</b>                                | <b>Species</b>                 | <b>Site</b>                                                                                              | <b>E<sub>ads</sub></b> | <b>Bond lengths (Å)</b>                                                                                                 | <b>Bond angles(degrees)</b>                                                                                                            |
|                                               | H <sub>2</sub> S               | no S, H <sub>2</sub> S-Ti <sub>5c</sub>                                                                  | -0.20                  | S-Ti <sub>5c</sub> = 2.69; H-S-H = 1.35                                                                                 | H-S-H = 93.6                                                                                                                           |
|                                               | H <sub>2</sub> S               | no S, H <sub>2</sub> S-O <sub>2c</sub> (vac)                                                             | -0.27                  |                                                                                                                         | H-S-H = 92.7                                                                                                                           |
|                                               | H <sub>2</sub> S               | no S, H <sub>2</sub> S-O <sub>3c</sub>                                                                   | -0.31                  | S-O <sub>3c</sub> = 3.0; H-S-H = 1.35                                                                                   | H-S-H = 93.6                                                                                                                           |
|                                               | S + H <sub>2</sub> S           | S-O <sub>2c</sub> , H <sub>2</sub> S-O <sub>2c</sub> (vac)                                               | -0.21                  | S-O <sub>2c</sub> = 1.73                                                                                                | H-S-H = 98                                                                                                                             |
|                                               | S + H <sub>2</sub> S           | S-O <sub>2c</sub> , H <sub>2</sub> S-Ti <sub>5c</sub>                                                    | -0.24                  | S-O <sub>2c</sub> = 1.72-- S-Ti <sub>5c</sub> = 2.67; H-S-H = 1.35                                                      |                                                                                                                                        |
|                                               | S + H <sub>2</sub> S           | S-O <sub>2c</sub> , H <sub>2</sub> S-O <sub>3c</sub>                                                     | -0.96                  | S-O <sub>2c</sub> = 1.66-- S-O <sub>3c</sub> = 2.98; H-S-H = 1.35                                                       | S-O <sub>2c</sub> -Ti=66.5°                                                                                                            |
|                                               | S + H <sub>2</sub> S + OH      | S-O <sub>2c</sub> , H <sub>2</sub> S-Ti <sub>5c</sub> , OH-O <sub>2c</sub>                               | -4.64                  | S-O <sub>2c</sub> = 1.67-- S-Ti <sub>5c</sub> = 2.61; H-S-H = 1.35&1.4-- O-Ti <sub>5c</sub> = 1.9; O-H = 0.97           | O <sub>2c</sub> -S-Ti <sub>5c</sub> = 69.4-- H-S-H = 96.5; H-S-Ti <sub>5c</sub> = 103.6-- H-O-Ti <sub>5c</sub> = 142.5                 |
|                                               | S + H <sub>2</sub> S(90°) + OH | S-O <sub>2c</sub> , H <sub>2</sub> S-O <sub>2c</sub> (vac), with H atoms 90° rotated, OH-O <sub>2c</sub> | -2.67                  | S-O <sub>2c</sub> = 1.72-- H-S-H = 1.35-- O-Ti <sub>5c</sub> = 1.87; O-H = 0.97                                         | O <sub>2c</sub> -S-Ti <sub>5c</sub> = 43.1-- H-S-H = 107.8; Ti <sub>5c</sub> -S-Ti <sub>5c</sub> =101.1-- H-O-Ti <sub>5c</sub> = 148.2 |
|                                               | H <sub>2</sub> S(90°) + OH     | no S, H <sub>2</sub> S-O <sub>2c</sub> (vac), with H atoms 90° rotated, OH-O <sub>2c</sub>               | -2.25                  | S-Ti <sub>5c</sub> = 2.52; H-S-H = 1.35&1.4-- O-Ti <sub>5c</sub> = 1.87; O-H = 0.96                                     | Ti <sub>5c</sub> -S-Ti <sub>5c</sub> =94.1; H-O-Ti <sub>5c</sub> =151.7                                                                |
|                                               |                                |                                                                                                          |                        |                                                                                                                         |                                                                                                                                        |
| <b>Perfect surface TiO<sub>2</sub> (p2x2)</b> | S+HS+H(l)                      | S-O <sub>2c</sub> , one H of H <sub>2</sub> S-Ti <sub>5c</sub> on left O <sub>2c</sub>                   | -1.49                  | S-O <sub>2c</sub> = 1.72-- S-Ti <sub>5c</sub> = 2.39; H-S = 1.34-- O-H = 1.0                                            | Ti <sub>5c</sub> -O-H=72.7                                                                                                             |
|                                               | S+HS+H(r)                      | S-O <sub>2c</sub> , one H of H <sub>2</sub> S-Ti <sub>5c</sub> on right O <sub>2c</sub>                  | -1.49                  | S-O <sub>2c</sub> = 1.72-- S-Ti <sub>5c</sub> = 2.41; H-S = 1.34-- O-H = 1.0                                            | Ti <sub>5c</sub> -O-H=98.1                                                                                                             |
|                                               | S+S+H+H                        | S-O <sub>2c</sub> , one H each of H <sub>2</sub> S-                                                      |                        | S-O <sub>2c</sub> = 1.73-- S-Ti <sub>5c</sub> = 2.26-- O <sub>2c</sub> -                                                | Ti <sub>5c</sub> -O-H=72.7                                                                                                             |

|                         |                                 |                                                                                                                                            |       |                                                                                                           |                                                              |
|-------------------------|---------------------------------|--------------------------------------------------------------------------------------------------------------------------------------------|-------|-----------------------------------------------------------------------------------------------------------|--------------------------------------------------------------|
|                         |                                 | O <sub>3c</sub> on left O <sub>2c</sub> and on right O <sub>2c</sub>                                                                       |       | H-S=1.22-- O-H = 0.98                                                                                     |                                                              |
| <b>Defected Surface</b> | S + HS + H(lt)                  | S-O <sub>2c</sub> , one H of H <sub>2</sub> S-Ti <sub>5c</sub> on left O <sub>2c(vac)</sub>                                                | -1.6  | S-O <sub>2c</sub> = 1.72-- S-Ti <sub>5c</sub> = 2.27; H-S = 1.34-- H-Ti <sub>5c</sub> =1.75               | Ti <sub>5c</sub> -O-Ti <sub>5c</sub> =147.7                  |
|                         | S + HS + H(rt)                  | S-O <sub>2c</sub> , one H of H <sub>2</sub> S-Ti <sub>5c</sub> on right O <sub>2c</sub>                                                    | -1.6  | S-O <sub>2c</sub> = 1.72-- S-Ti <sub>5c</sub> = 2.35; H-S = 1.34-- H-O <sub>2c</sub> = 0.98               | Ti <sub>5c</sub> -O-H=101.1                                  |
|                         | HS (90°) + H <sub>2</sub> O     | no S,H <sub>2</sub> S-O <sub>2c(vac)</sub> , with H atoms 90° rotated and one H of H <sub>2</sub> S added to OH-O <sub>2c</sub>            | -3.62 | H-S = 1.36--O-Ti <sub>5c</sub> = 2.4; H-O-H = 0.98                                                        | Ti <sub>5c</sub> -S-Ti <sub>5c</sub> = 109-- H-O-H = 109.3   |
|                         | S + HS (90°) + H <sub>2</sub> O | S-O <sub>2c</sub> ,H <sub>2</sub> S- O <sub>2c(vac)</sub> , with H atoms 90° rotated one H of H <sub>2</sub> S added to OH-O <sub>2c</sub> | -3.79 | S-O <sub>2c</sub> = 1.72-- S-O <sub>2c</sub> = 1.72-- H-S = 1.36--O-Ti <sub>5c</sub> = 2.32; H-O-H = 0.98 | Ti <sub>5c</sub> -S-Ti <sub>5c</sub> = 109.9-- H-O-H = 110.2 |
